# Supplementary material for: Moderate Hypothermia to Treat Perinatal Asphyxial Encephalopathy
Source: Atypon-hosted journal article supplement (doi:10.1056/nejmoa0900854), 2009-09-30
Supplement: nejm_azzopardi_1349sa1.pdf [file nejm_azzopardi_1349sa1.pdf]

## Supplementary Appendix

This appendix has been provided by the authors to give readers additional information about their work.

Supplement to: Azzopardi DV, Strohm B, Edwards AD, et al. Moderate hypothermia to treat perinatal asphyxial encephalopathy. *N Engl J Med* 2009;361:1349-58.

## **Supplementary Appendix 1 (web appendix 1)**

### **Definitions of adverse events**

**Pulmonary airleak:** Any radiologically confirmed airleak serious enough to affect management (including pulmonary interstitial emphysema, pneumopericardium, pneumoperitoneum and pneumomediastinum).

**Pulmonary haemorrhage:** Copious bloody secretions with clinical deterioration requiring change(s) in ventilatory management.

**Persistent pulmonary hypertension:** Severe hypoxaemia disproportionate to the severity of lung disease and evidence of a right to left shunt.

**Major cerebral anomaly:** Evidence of parenchymal haemorrhage as determined by ultrasound, ventricular dilatation (defined as >97th centile for gestational age) or the presence of porencephalic cysts or cystic leukomalacia.

**Meconium aspiration syndrome:** The presence of meconium stained liquor at birth and severe respiratory distress with 1 hour of birth and compatible X ray changes.

**Necrotising enterocolitis:** Infants with abdominal distension, gastric aspirate and/or blood in stools together with abdominal X ray showing bowel oedema, pneumatosis or pneumoperitoneum, i.e. Bell's staging 2 or 3

**Late onset sepsis (>72 hours after birth) confirmed by blood or CSF culture:**

Any evidence of infection requiring antibiotic therapy which is confirmed on culture.

**Thrombocytopenia:** Platelet count less than  $150 \times 10^9/L$

**Abnormal coagulation:** Either a prothrombin time > 16 seconds, or an INR > 2.5 or an activated partial thromboplastin time > 49.5 seconds.

Supplementary Appendix 2 (web appendix)

Complete analysis of neurodevelopmental outcomes at 18 months

| Outcome                                                                                                                             | Intensive care with cooling | Intensive care only | Comparative statistics - Risk ratio plus 95% CIs unless indicated |
|-------------------------------------------------------------------------------------------------------------------------------------|-----------------------------|---------------------|-------------------------------------------------------------------|
| <b>COMPOSITE PRIMARY OUTCOME</b> – no. (%)                                                                                          | <b>163 (100%)</b>           | <b>162 (100%)</b>   |                                                                   |
| Combined mortality and severe neurodevelopmental disability – no./total no. (%)                                                     | 74/163 (45)                 | 86/162 (53)         | 0.86 (0.68 – 1.07)<br>P=0.17                                      |
| <i>Not known</i> – no./total no. (%)                                                                                                | 1/163 (0.6)                 | 1/162 (0.6)         |                                                                   |
| Defined as <b>ONE</b> of :<br><br>1. Bayley MDI score <70<br>2. GMF impairment level 3-5<br>3. Bilateral cortical visual impairment |                             |                     |                                                                   |
| <b>SECONDARY OUTCOMES</b>                                                                                                           |                             |                     |                                                                   |
| <b>Mortality</b>                                                                                                                    |                             |                     |                                                                   |
| Deaths before discharge – no./total no. (%)                                                                                         | 39/163 (24)                 | 39/162 (24)         | 0.99 (0.67 – 1.46)<br>P=0.98                                      |
| Total deaths – no./total no. (%)                                                                                                    | 42/163 (26)                 | 44/162 (27)         | 0.95 (0.66 – 1.36)<br>P=0.78                                      |
| Withdrawal of care – no./total no. (%)                                                                                              | 34/39 (87)                  | 29/39 (74)          | N/A                                                               |
| <i>Not known</i> – no./total no. (%)                                                                                                | 3/39 (8)                    | 4/39 (10)           |                                                                   |

|                                                                                                                                                                                                                 |                                                      |                                                      |                                                                                 |
|-----------------------------------------------------------------------------------------------------------------------------------------------------------------------------------------------------------------|------------------------------------------------------|------------------------------------------------------|---------------------------------------------------------------------------------|
| Survival without neurological abnormality - no./total no. (%)<br>Defined as MDI >84, PDI >84, no neuromotor impairment, normal vision, normal hearing.                                                          | 71/163 (44)                                          | 45/162 (28)                                          | 1.57 (1.16-2.12)<br><br>P=0.003                                                 |
| <b>NEURODEVELOPMENTAL OUTCOMES IN SURVIVORS – no. (%)</b>                                                                                                                                                       | <b>120 (100%)</b>                                    | <b>117 (100%)</b>                                    |                                                                                 |
| Lost to follow-up - no.                                                                                                                                                                                         | 1                                                    | 1                                                    |                                                                                 |
| Severe neurodevelopmental disability - no./total no. (%)                                                                                                                                                        | 32/120 (27)                                          | 42/117 (36)                                          | 0.74 (0.51 – 1.09)<br><br>P=0.13                                                |
| Bayley MDI score <70 – no.<br><br>Includes <i>too disabled to test</i><br>– no.<br><br>< 55 – no.<br><br>Score unavailable – no. (%)<br><br><i>Not known</i> – no.<br><br><i>uncooperative/unreliable</i> – no. | 28<br><br>22<br><br>4<br><br>5 (4)<br><br>3<br><br>2 | 38<br><br>31<br><br>2<br><br>7 (6)<br><br>3<br><br>4 | 28/115 (24%) vs.<br><br>38/110 (35%)<br><br>RR 0.70 (0.47 – 1.06)<br><br>P=0.09 |
| Bayley MDI score categories<br><br><70 - no. (%)<br><br>70-84 - no.(%)<br><br>≥ 85 - no.(%)                                                                                                                     | <br><br>28 (24)<br><br>6 (5)<br><br>81 (70)          | <br><br>38 (35)<br><br>12 (11)<br><br>60 (55)        | Chi squared test<br><br>for linear trend on MDI levels vs. allocation P=0.03    |

|                                            |                   |                      |                                                                                            |
|--------------------------------------------|-------------------|----------------------|--------------------------------------------------------------------------------------------|
| Bayley MDI score [n; Median (IQR)]         | 89; 96 (89, 105)  | 77; 93 (85.5, 102.5) | Difference in median plus 95% CI; P-value from Wilcoxon rank-sum test<br>4 (0 to 8) P=0.04 |
| Bayley PDI score <70 - no.                 | 27                | 37                   | 27 /114 (24%) vs. 37/109 (34%)<br>RR 0.70 (0.46 – 1.06)<br>P=0.09                          |
| Includes <i>too disabled to test</i> – no. | 22                | 31                   |                                                                                            |
| < 55 – no.                                 | 4                 | 4                    |                                                                                            |
| Score unavailable – no. (%)                | 6 (5)             | 8 (7)                |                                                                                            |
| Not known – no.                            | 5                 | 6                    |                                                                                            |
| uncooperative/unreliable - no.             | 1                 | 2                    |                                                                                            |
| Bayley PDI score categories                |                   |                      | Chi squared test for linear trend on PDI levels vs. allocation P=0.03                      |
| <70 – no. (%)                              | 27 (24)           | 37 (34)              |                                                                                            |
| 70-84 – no. (%)                            | 9 (8)             | 14 (13)              |                                                                                            |
| ≥ 85 – no. (%)                             | 78 (68)           | 58 (53)              |                                                                                            |
| Bayley PDI [n; Median (IQR)]               | 88; 102 (90, 110) | 74; 98 (86, 105)     | Difference in median plus 95% CI; P-value from Wilcoxon rank-sum test<br>5 (1 to 9) P=0.02 |

|                                                                                                                                                                                                                                                                                                                            |                      |                      |                                                                     |
|----------------------------------------------------------------------------------------------------------------------------------------------------------------------------------------------------------------------------------------------------------------------------------------------------------------------------|----------------------|----------------------|---------------------------------------------------------------------|
| Gross Motor Function neuromotor impairment levels 3 to 5 – no./total no. (%)                                                                                                                                                                                                                                               | 24/120 (20)          | 36/117 (31)          | 0.65 (0.41 – 1.02)<br>P=0.06                                        |
| Bilateral cortical visual impairment (No useful vision or light or gross movement only) - no.<br><br><i>Not known – no. (%)</i>                                                                                                                                                                                            | 8<br><br>1 (1)       | 12<br><br>3 (3)      | 8/119 (7%) vs.<br>12/114 (11%)<br>RR 0.64 (0.27 – 1.50)<br>P=0.30   |
| No useful hearing – no. (%)<br><br><i>Not known – no. (%)</i>                                                                                                                                                                                                                                                              | 0 (0)<br><br>6 (5)   | 1 (1)<br><br>9 (8)   | unestimable                                                         |
| Epilepsy –no. (Seizures requiring anticonvulsant therapy at the time of assessment}<br><br><i>Not known – no. (%)</i>                                                                                                                                                                                                      | 12<br><br>4 (3)      | 16<br><br>1 (1)      | 12/116 (10%) vs.<br>16/116 (14%)<br>RR 0.75 (0.37 – 1.51)<br>P=0.42 |
| Multiple neurodevelopmental disability – no. (%)<br><br><i>Not known – no. (%)</i><br><br>(Defined as the presence of <b>any two</b> of the following in an infant; neuromotor disability (Level 3-5 on GMF classification), mental delay (Bayley MDI score <70), epilepsy, cortical visual impairment, no useful hearing) | 21 (18)<br><br>2 (2) | 33 (20)<br><br>2 (2) | 21/112 (19%) vs.<br>33/110 (30%)<br>RR 0.63 (0.39 – 1.01) P=0.05    |

| <b>Outcome</b>                                                            | <b>Intensive care<br/>with cooling<br/>– no.<br/>120</b> | <b>Intensive<br/>care only<br/>– no.<br/>117</b> | <b>Comparative<br/>statistics (P value)<br/>Risk ratio plus 95%<br/>CIs unless indicated</b> |
|---------------------------------------------------------------------------|----------------------------------------------------------|--------------------------------------------------|----------------------------------------------------------------------------------------------|
| <b>Hand preference</b> (majority on both attempts)                        |                                                          |                                                  |                                                                                              |
| Majority left – no. (%)                                                   | 11 (9)                                                   | 8 (7)                                            |                                                                                              |
| Majority right – no. (%)                                                  | 80 (67)                                                  | 68 (58)                                          |                                                                                              |
| Equal left and right – no. (%)                                            | 6 (5)                                                    | 10 (9)                                           |                                                                                              |
| Not attempted – no. (%)                                                   | 23 (19)                                                  | 31 (26)                                          |                                                                                              |
|                                                                           |                                                          |                                                  |                                                                                              |
| <b>Axis - head &amp; neck</b>                                             |                                                          |                                                  |                                                                                              |
| Normal head control – no. (%)                                             | 94 (78)                                                  | 80 (68)                                          | 1.15 (0.98 – 1.34)<br>P=0.08                                                                 |
| Abnormal head control – no. (%)                                           | 7 (6)                                                    | 13 (11)                                          |                                                                                              |
| Poor head control – no. (%)                                               | 14 (12)                                                  | 15 (13)                                          |                                                                                              |
| No obvious head control - no. (%)                                         | 5 (4)                                                    | 9 (8)                                            |                                                                                              |
|                                                                           |                                                          |                                                  |                                                                                              |
| <b>Trunk</b>                                                              |                                                          |                                                  |                                                                                              |
| No apparent problem – no. (%)                                             | 91 (76)                                                  | 75 (64)                                          | 1.18 (1.00 – 1.40)<br>P=0.05                                                                 |
| Can sit unsupported (less secure than normal child of same age) – no. (%) | 6 (5)                                                    | 8 (7)                                            |                                                                                              |

| <b>Outcome</b>                                                              | <b>Intensive care<br/>with cooling<br/>– no.<br/>120</b> | <b>Intensive<br/>care only<br/>– no.<br/>117</b> | <b>Comparative<br/>statistics (P value)<br/>Risk ratio plus 95%<br/>CIs unless indicated</b> |
|-----------------------------------------------------------------------------|----------------------------------------------------------|--------------------------------------------------|----------------------------------------------------------------------------------------------|
| Cannot be left sitting unless supported – no. (%)                           | 10 (8)                                                   | 17 (15)                                          |                                                                                              |
| Very severe impairment (difficult to place in a sitting position) – no. (%) | 13 (11)                                                  | 17 (15)                                          |                                                                                              |
|                                                                             |                                                          |                                                  |                                                                                              |
| <b>Lower limb function - gait</b>                                           |                                                          |                                                  |                                                                                              |
| Walks fluently – no. (%)                                                    | 79 (66)                                                  | 59 (50)                                          | 79/117 (68%) vs.<br>59/115 (51%)<br>RR 1.32 (1.06 – 1.64)<br>P=0.01                          |
| Gait functional but non-fluent – no. (%)                                    | 8 (7)                                                    | 12 (10)                                          |                                                                                              |
| Reduced mobility restricting life-style – no. (%)                           | 0 (0)                                                    | 1 (1)                                            |                                                                                              |
| No independent walking– no. (%)                                             | 30 (25)                                                  | 43 (37)                                          |                                                                                              |
| <i>Not known (all appear to be walking)</i> – no. (%)                       | 3 (3)                                                    | 2 (2)                                            |                                                                                              |
|                                                                             |                                                          |                                                  |                                                                                              |
| <b>Upper limb function</b>                                                  |                                                          |                                                  |                                                                                              |
| No apparent problem – no. (%)                                               | 89 (74)                                                  | 71 (61)                                          | 1.22 (1.02 – 1.46)<br>P=0.03                                                                 |

| <b>Outcome</b>                                             | <b>Intensive care<br/>with cooling<br/>– no.<br/>120</b> | <b>Intensive<br/>care only<br/>– no.<br/>117</b> | <b>Comparative<br/>statistics (P value)<br/>Risk ratio plus 95%<br/>CIs unless indicated</b> |
|------------------------------------------------------------|----------------------------------------------------------|--------------------------------------------------|----------------------------------------------------------------------------------------------|
| Some difficulty using hands together, feeds self – no. (%) | 5 (4)                                                    | 13 (11)                                          |                                                                                              |
| Unable to feed self with either hand – no. (%)             | 26 (22)                                                  | 33 (28)                                          |                                                                                              |
|                                                            |                                                          |                                                  |                                                                                              |
| <b>Contractures</b>                                        |                                                          |                                                  |                                                                                              |
| Present – no. (%)                                          | 13 (11)                                                  | 11 (9)                                           |                                                                                              |
| <i>Not known</i> – no. (%)                                 | 2 (2)                                                    | 1 (1)                                            |                                                                                              |
|                                                            |                                                          |                                                  |                                                                                              |
| <b>Convulsions</b>                                         |                                                          |                                                  |                                                                                              |
| Currently on anticonvulsant medication – no. (%)           | 12 (10)                                                  | 16 (14)                                          | 12/116 (10%) vs.<br>16/116 (14%)<br>RR 0.75 (0.37 – 1.51)<br>P=0.42                          |
| <i>Not known</i> – no. (%)                                 | 4 (3)                                                    | 1 (1)                                            |                                                                                              |
|                                                            |                                                          |                                                  |                                                                                              |
| No convulsions, no treatment – no. (%)                     | 95 (79)                                                  | 98 (84)                                          |                                                                                              |
| <i>Not known</i> – no. (%)                                 | 4 (3)                                                    | 1 (1)                                            |                                                                                              |
|                                                            |                                                          |                                                  |                                                                                              |
| Convulsion in last 12 months – no. (%)                     | 21 (18)                                                  | 17 (15)                                          |                                                                                              |

| <b>Outcome</b>                                          | <b>Intensive care<br/>with cooling<br/>– no.<br/>120</b> | <b>Intensive<br/>care only<br/>– no.<br/>117</b> | <b>Comparative<br/>statistics (P value)<br/>Risk ratio plus 95%<br/>CIs unless indicated</b> |
|---------------------------------------------------------|----------------------------------------------------------|--------------------------------------------------|----------------------------------------------------------------------------------------------|
| <i>Not known</i> – no. (%)                              | 0 (0)                                                    | 1 (1)                                            |                                                                                              |
| Convulsion in last month – no.<br>(%)                   | 9 (8)                                                    | 11 (9)                                           |                                                                                              |
| <b>Visual or eye problem</b>                            |                                                          |                                                  |                                                                                              |
| Wears glasses – no. (%)                                 | 1 (1)                                                    | 2 (2)                                            |                                                                                              |
| <i>Not known</i> – no. (%)                              | 1 (1)                                                    | 2 (2)                                            |                                                                                              |
| Squint present – no. (%)                                | 8 (7)                                                    | 19 (16)                                          | 8/118 (7%) vs. 19/114<br>(17%)<br>RR 0.41 (0.19 – 0.89)<br>P=0.02                            |
| <i>Not known</i> – no. (%)                              | 2 (2)                                                    | 3 (3)                                            |                                                                                              |
| Normal or near normal vision –<br>no. (%)               | 108 (90)                                                 | 96 (82)                                          | 108/119 (91%) vs.<br>96/114 (84%)<br>RR 1.08 (0.98 – 1.19)<br>P=0.13                         |
| Impaired but appears to have<br>useful vision – no. (%) | 3 (3)                                                    | 6 (5)                                            |                                                                                              |

| <b>Outcome</b>                                       | <b>Intensive care<br/>with cooling<br/>– no.<br/>120</b> | <b>Intensive<br/>care only<br/>– no.<br/>117</b> | <b>Comparative<br/>statistics (P value)<br/>Risk ratio plus 95%<br/>CIs unless indicated</b> |
|------------------------------------------------------|----------------------------------------------------------|--------------------------------------------------|----------------------------------------------------------------------------------------------|
| Light or gross movement only –<br>no. (%)            | 7 (6)                                                    | 8 (7)                                            |                                                                                              |
| No useful vision (blind) – no. (%)                   | 1 (1)                                                    | 4 (3)                                            |                                                                                              |
| <i>Not known</i> – no. (%)                           | 1 (1)                                                    | 3 (3)                                            |                                                                                              |
|                                                      |                                                          |                                                  |                                                                                              |
| <b>Hearing problem</b>                               |                                                          |                                                  |                                                                                              |
| Normal or near normal – no. (%)                      | 110 (92)                                                 | 97 (83)                                          | 110/114 (96%) vs.<br>97/108 (90%)<br>RR 1.07 (1.00 – 1.16)<br>P=0.05                         |
| Hearing loss corrected with aids –<br>no. (%)        | 0 (0)                                                    | 4 (3)                                            |                                                                                              |
| Some hearing loss not corrected<br>by aids – no. (%) | 4 (3)                                                    | 6 (5)                                            |                                                                                              |
| No useful hearing even with aids<br>– no. (%)        | 0 (0)                                                    | 1 (1)                                            |                                                                                              |
| <i>Not known</i> – no. (%)                           | 6 (5)                                                    | 9 (8)                                            |                                                                                              |

| <b>Outcome</b>                                                 | <b>Intensive care<br/>with cooling<br/>- no.<br/>120</b> | <b>Intensive<br/>care only<br/>-no.<br/>117</b> | <b>Comparative<br/>statistics (P value)<br/>Risk ratio plus 95%<br/>CIs unless indicated</b> |
|----------------------------------------------------------------|----------------------------------------------------------|-------------------------------------------------|----------------------------------------------------------------------------------------------|
| <b>Mouth</b>                                                   |                                                          |                                                 |                                                                                              |
| Problem with articulation of speech                            |                                                          |                                                 |                                                                                              |
| No – no. (%)                                                   | 86 (72)                                                  | 72 (62)                                         | 86/97 (89%) vs. 72/81                                                                        |
| Yes – no. (%)                                                  | 11 (9)                                                   | 9 (8)                                           | (89%)                                                                                        |
| <i>Not known</i> – no. (%)                                     | 8 (7)                                                    | 4 (3)                                           | RR 1.00 (0.90 – 1.11)                                                                        |
| <i>Not applicable</i> – no. (%)                                | 15 (13)                                                  | 32 (27)                                         | P=0.96                                                                                       |
| Excessive drooling or dribbling<br>during waking hours         |                                                          |                                                 |                                                                                              |
| No – no. (%)                                                   | 88 (73)                                                  | 79 (67)                                         | 88/118 (75%) vs.                                                                             |
| Yes – no. (%)                                                  | 30 (25)                                                  | 35 (30)                                         | 79/114 (69%) RR                                                                              |
| <i>Not known</i> – no. (%)                                     | 2 (2)                                                    | 3 (3)                                           | 1.08 (0.92 – 1.26)                                                                           |
|                                                                |                                                          |                                                 | P=0.37                                                                                       |
| <b>Usual form of communication</b>                             |                                                          |                                                 |                                                                                              |
| Speech – no. (%)                                               | 91 (76)                                                  | 74 (63)                                         | 91/119 (76%) vs.<br>74/117 (63%)<br>RR 1.21 (1.02 – 1.43)<br>P=0.03                          |
| Speech + formal systemised<br>methods (e.g. signing) – no. (%) | 4 (3)                                                    | 6 (5)                                           |                                                                                              |
| Formal systemised method only –                                | 4 (3)                                                    | 6 (5)                                           |                                                                                              |

| <b>Outcome</b>                                           | <b>Intensive care<br/>with cooling<br/>- no.<br/>120</b> | <b>Intensive<br/>care only<br/>-no.<br/>117</b> | <b>Comparative<br/>statistics (P value)<br/><br/>Risk ratio plus 95%<br/>CIs unless indicated</b> |
|----------------------------------------------------------|----------------------------------------------------------|-------------------------------------------------|---------------------------------------------------------------------------------------------------|
| no. (%)                                                  |                                                          |                                                 |                                                                                                   |
| Not communicating by speech or<br>other method – no. (%) | 20 (17)                                                  | 31 (26)                                         |                                                                                                   |
| <i>Not known</i> – no. (%)                               | 1 (1)                                                    | 0 (0)                                           |                                                                                                   |
|                                                          |                                                          |                                                 |                                                                                                   |
| <b>Feeding</b>                                           |                                                          |                                                 |                                                                                                   |
| Feeding difficulties present?                            |                                                          |                                                 |                                                                                                   |
| No – no. (%)                                             | 82 (68)                                                  | 76 (65)                                         |                                                                                                   |
| Yes – no. (%)                                            | 38 (32)                                                  | 41 (35)                                         | 0.90 (0.63 – 1.30)<br>P=0.58                                                                      |
|                                                          |                                                          |                                                 |                                                                                                   |
| Does or has the child require(d)<br>tube feeding?        |                                                          |                                                 |                                                                                                   |
| No – no. (%)                                             | 101 (84)                                                 | 93 (79)                                         |                                                                                                   |
| Yes – no. (%)                                            | 19 (16)                                                  | 23 (20)                                         | 19/120 (16%) vs.                                                                                  |
| <i>Not known</i> – no. (%)                               | 0 (0)                                                    | 1 (1)                                           | 23/116 (20%)<br>RR 0.80 (0.46 – 1.39)<br>P=0.42                                                   |
| If <b>yes</b> , does the child have:                     |                                                          |                                                 |                                                                                                   |
| a stoma? – no. (%)                                       | 0 (0)                                                    | 1 (1)                                           |                                                                                                   |
| a gastrostomy? – no. (%)                                 | 10 (8)                                                   | 10 (9)                                          |                                                                                                   |
|                                                          |                                                          |                                                 |                                                                                                   |
| <b>GMFCS</b>                                             |                                                          |                                                 |                                                                                                   |

| <b>Outcome</b>                             | <b>Intensive care<br/>with cooling<br/>- no.<br/>120</b> | <b>Intensive<br/>care only<br/>-no.<br/>117</b> | <b>Comparative<br/>statistics (P value)<br/>Risk ratio plus 95%<br/>CIs unless indicated</b>                                                                     |
|--------------------------------------------|----------------------------------------------------------|-------------------------------------------------|------------------------------------------------------------------------------------------------------------------------------------------------------------------|
| No neurological abnormality – no.<br>(%)   | 85 (71)                                                  | 63 (54)                                         | Survivors assessed:<br>1.32 (1.07 – 1.61)<br>P=0.007<br>Intention-to-treat<br>population: 85/163<br>(52%) vs. 63/162<br>(39%)<br>RR 1.34 (1.05 – 1.71)<br>P=0.02 |
| Level 1-2                                  | 11 (9)                                                   | 18 (15)                                         |                                                                                                                                                                  |
| Level 3-5                                  | 24 (20)                                                  | 36 (31)                                         |                                                                                                                                                                  |
|                                            |                                                          |                                                 | Chi squared test on<br>linear trend of<br>GMFCS levels vs.<br>allocation P=0.01                                                                                  |
| <b>Neurological examination<br/>scores</b> |                                                          |                                                 |                                                                                                                                                                  |

| <b>Outcome</b>                                                     | <b>Intensive care<br/>with cooling<br/>- no.<br/>120</b> | <b>Intensive<br/>care only<br/>-no.<br/>117</b> | <b>Comparative<br/>statistics (P value)<br/>Risk ratio plus 95%<br/>CIs unless indicated</b>                                                                    |
|--------------------------------------------------------------------|----------------------------------------------------------|-------------------------------------------------|-----------------------------------------------------------------------------------------------------------------------------------------------------------------|
| Total raw score median, (IQR)<br>no.<br><i>Not known – no. (%)</i> | 74 (61.25-75)<br>108<br>12 (10)                          | 72 (43.25-75)<br>106<br>11 (9)                  | Difference in median<br>plus 95% CI; P-value<br>from Wilcoxon rank-<br>sum test<br>0 (0 to 2) P=0.10                                                            |
|                                                                    |                                                          |                                                 |                                                                                                                                                                 |
| > 73 (%) – no. (%)                                                 | 84 (70)                                                  | 75 (64)                                         |                                                                                                                                                                 |
| 65 - 73 (%) – no. (%)                                              | 2 (2)                                                    | 2 (2)                                           |                                                                                                                                                                 |
| < 65 (%) – no. (%)                                                 | 22 (18)                                                  | 29 (25)                                         |                                                                                                                                                                 |
| <i>Not known – no. (%)</i>                                         | 12 (10)                                                  | 11 (9)                                          |                                                                                                                                                                 |
| <b>Neurological abnormality</b>                                    |                                                          |                                                 |                                                                                                                                                                 |
| No abnormality – no. (%)                                           | 87 (73)                                                  | 69 (59)                                         | Survivors assessed:<br>1.23 (1.02 – 1.48)<br>P=0.03<br>Intention-to-treat<br>population: 87/163<br>(53%) vs. 69/162<br>(43%)<br>RR 1.25 (1.00 – 1.58)<br>P=0.05 |
| Spastic bilateral 2 limb<br>involvement – no. (%)                  | 1 (1)                                                    | 2 (2)                                           |                                                                                                                                                                 |

| <b>Outcome</b>                                    | <b>Intensive care<br/>with cooling<br/>- no.<br/>120</b> | <b>Intensive<br/>care only<br/>-no.<br/>117</b> | <b>Comparative<br/>statistics (P value)<br/><br/>Risk ratio plus 95%<br/>CIs unless indicated</b> |
|---------------------------------------------------|----------------------------------------------------------|-------------------------------------------------|---------------------------------------------------------------------------------------------------|
| +left sided hemiplegia – no. (%)                  | 1 (1)                                                    | 0 (0)                                           |                                                                                                   |
| Spastic bilateral 3 limb<br>involvement – no. (%) | 0 (0)                                                    | 1 (1)                                           |                                                                                                   |
| +right sided hemiplegia – no. (%)                 | 0 (0)                                                    | 1 (1)                                           |                                                                                                   |
| Spastic bilateral 4 limb<br>involvement – no. (%) | 23 (19)                                                  | 29 (25)                                         |                                                                                                   |
| + choreoathetoid movement<br>disorder – no. (%)   | 1 (1)                                                    | 1 (1)                                           |                                                                                                   |
| + dystonic movement disorder –<br>no. (%)         | 0 (0)                                                    | 1 (1)                                           |                                                                                                   |
| + right sided hemiplegia – no. (%)                | 1 (1)                                                    | 0 (0)                                           |                                                                                                   |
| Right sided hemiplegia – no. (%)                  | 0 (0)                                                    | 0 (0)                                           |                                                                                                   |
| Left sided hemiplegia – no. (%)                   | 0 (0)                                                    | 1 (1)                                           |                                                                                                   |
| Movement disorder (dyskinetic) –<br>no. (%)       | 2 (2)                                                    | 3 (3)                                           |                                                                                                   |
| Choreoathetoid – no. (%)                          | 1 (1)                                                    | 3 (3)                                           |                                                                                                   |
| Non-classifiable – no. (%)                        | 3 (3)                                                    | 5 (4)                                           |                                                                                                   |
|                                                   |                                                          |                                                 |                                                                                                   |
| <b>Distribution of involvement</b>                |                                                          |                                                 |                                                                                                   |
| L/R asymmetry of tone or function<br>– no. (%)    | 17 (14)                                                  | 16 (14)                                         |                                                                                                   |
| <i>Not known</i> – no. (%)                        | 0 (0)                                                    | 2 (1)                                           |                                                                                                   |

| <b>Outcome</b>                                     | <b>Intensive care<br/>with cooling<br/>- no.<br/>120</b> | <b>Intensive<br/>care only<br/>-no.<br/>117</b> | <b>Comparative<br/>statistics (P value)<br/><br/>Risk ratio plus 95%<br/>CIs unless indicated</b> |
|----------------------------------------------------|----------------------------------------------------------|-------------------------------------------------|---------------------------------------------------------------------------------------------------|
| <b>If <i>yes</i>, which is worse?</b>              |                                                          |                                                 |                                                                                                   |
| R – no. (%)                                        | 9 (8)                                                    | 6 (5)                                           |                                                                                                   |
| L – no. (%)                                        | 8 (7)                                                    | 10 (9)                                          |                                                                                                   |
| <b>Upper/Lower equally affected?</b>               |                                                          |                                                 |                                                                                                   |
| No – no. (%)                                       | 20 (17)                                                  | 16 (14)                                         |                                                                                                   |
| Yes – no. (%)                                      | 76 (63)                                                  | 74 (63)                                         |                                                                                                   |
| <i>Not known</i> – no. (%)                         | 7 (6)                                                    | 15 (13)                                         |                                                                                                   |
| <b>If <i>not equally</i>,</b>                      |                                                          |                                                 |                                                                                                   |
| Upper – no. (%)                                    | 8 (7)                                                    | 8 (7)                                           |                                                                                                   |
| Lower – no. (%)                                    | 11 (9)                                                   | 8 (7)                                           |                                                                                                   |
| <i>Not known</i> – no. (%)                         | 1 (1)                                                    | 0 (0)                                           |                                                                                                   |
|                                                    |                                                          |                                                 |                                                                                                   |
| <b>Head growth</b>                                 |                                                          |                                                 |                                                                                                   |
| Head circumference – age/sex<br>standardised (SDS) |                                                          |                                                 | Difference in mean<br>adjusted for baseline<br>value (analysis of<br>covariance)                  |
| Baseline mean (SD)                                 | -0.023 (1.17)                                            | 0.22 (1.13)                                     |                                                                                                   |
| Not known – no                                     | 41                                                       | 44                                              |                                                                                                   |
| Follow-up mean (SD)                                | -0.97 (1.84)                                             | -1.04 (2.06)                                    | 0.26 (-0.28 to 0.81)                                                                              |
| Not known – no.                                    | 6                                                        | 5                                               | P=0.34                                                                                            |

| <b>Outcome</b>                                                                                      | <b>Intensive care<br/>with cooling<br/>- no.<br/>120</b> | <b>Intensive<br/>care only<br/>-no.<br/>117</b> | <b>Comparative<br/>statistics (P value)<br/>Risk ratio plus 95%<br/>CIs unless indicated</b> |
|-----------------------------------------------------------------------------------------------------|----------------------------------------------------------|-------------------------------------------------|----------------------------------------------------------------------------------------------|
| Head circumference at follow-up<br>more than 2SD below the mean<br><br>– no.<br><br>Not known – no. | 24 (21)<br><br>6                                         | 28 (25)<br><br>5                                | 0.84 (0.52-1.36)<br><br>P=0.48                                                               |
